# Supplementary material for: Site-targeted decoration of palladium nanocrystals for catalytic CH4 removal in lean-burn exhaust
Source: Royal Society of Chemistry journal article supplement (doi:10.1039/d4ra02237h), 2024-01-01
Supplement: d4ra02237h1.pdf [file d4ra02237h1.pdf]

## Supplemental Information

### Site-targeted Decoration of Palladium Nanocrystals for catalytic CH<sub>4</sub> removal in Lean-burn Exhaust

Takashi Hihara,<sup>\*a,b</sup> Makoto Nagata<sup>a</sup>, Takeshi Fujita<sup>c</sup> and Hideki Abe<sup>\*b, d</sup>

<sup>a</sup> N.E. Chemcat corporation, 678 Ipponmatsu Numazu, Shizuoka 410-0312, Japan.

<sup>b</sup> Graduate school of Science and Technology, Saitama University, Shimo-Okubo 255, Sakura-ku, Saitama-shi, 338-8570, Japan

<sup>c</sup> Kohchi University of Technology, Kami Campus, 185 Miyanokuchi, Tosayamada, Kami City, Kochi 782-8502, Japan

<sup>d</sup> National Institution of Material & Substances, Namiki-site, 1-1 Namiki, Tsukuba, Ibaraki, 305-0044, Japan.

\* takashi.hihara@ne-chemcat.co.jp

\* ABE.Hideki@nims.go.jp

## Contents

### S1. Preliminary study of Pd crystal size with thermal treatment

#### S1-1. Backgrounds of the preliminary study

#### S1-2. Experimental

#### S1-3. Results

##### S1-3-1. XRD pattern and calculated PdO crystal size

Figure S1. XRD pattern of thermal pre-treated Pd/Al<sub>2</sub>O<sub>3</sub> samples.

Table S1. PdO crystal size calculated from XRD peak.

##### S1-3-2. CO pulse experimental results and calculated Pd crystal size

Table S2. Pd crystal size calculated with CO pulse experiment.

##### S1-3-3. STEM observation and image analysis result

Figure S2. Examples of STEM images on Pd/Al<sub>2</sub>O<sub>3</sub> samples.

Table S3. Calculated diameters based on STEM image analysis.

Table S4. Particle size distribution of Pd based on STEM image analysis.

Figure S3. Particle size distribution of Pd based on STEM image analysis.

##### S 1-3-4. Summary of PdO crystal size & Pd particle size by thermal treatment

Table S5. PdO crystal size and Pd Particle size.

##### S 1-3-5. Catalytic performance test for CH<sub>4</sub> removal

Figure S4. CH<sub>4</sub> removal test results and pre-treatment temperature effect on CH<sub>4</sub>-T20.

##### S 1-3.6. Conclusion of the preliminary study

### S2. Experimental details of Ni decoration methods

Figure S5. Detail experimental information about Ni-CVD.

Figure S6. Measurement result of the outer surface temperature of 3/8" stainless steel tube during Ni-CVD treatment at 250 °C.

### S3. Experimental details of characterizations

Table S6. Pd nanocrystal size before and after Ni-CVD treatment.

Figure S7. STEM-EDS results of WI at 17400 wt ppm Ni.

Figure S8. STEM-EDS results of WI-at 1300 wt ppm Ni.

Figure S9. STEM-EDS results of 20\_Ni@Pd/Al<sub>2</sub>O<sub>3</sub>.

Figure S10. STEM-EDS results of 6\_Ni@Pd/Al<sub>2</sub>O<sub>3</sub>.

Figure S11. STEM-EDS results of 100\_Ni@AS-Pd/Al<sub>2</sub>O<sub>3</sub> at low magnification.

Figure S12. STEM-EDS results of 100\_Ni@AS-Pd/Al<sub>2</sub>O<sub>3</sub> at high magnification.

Table S7. Comparison of Pd and Ni content, CH<sub>4</sub>-T20 of AS-Pd/Al<sub>2</sub>O<sub>3</sub> with Ni decoration by both WI and CVD.

Figure S13. Temperature decrease of CH<sub>4</sub>-T20 from AS-PdAl<sub>2</sub>O<sub>3</sub> without Nickel decoration.

## S1. Preliminary study of Pd crystal size with thermal treatment

### S1.1 Backgrounds of the preliminary study

The as-synthesized (AS) -Pd/Al<sub>2</sub>O<sub>3</sub> used in this study had a relatively small Pd crystal size. When considering site-targeted decoration of Ni on the edge of Pd nanocrystals for CH<sub>4</sub> removal, we decided to use Pd crystals intentionally grown rather than as-prepared and applied a prior thermal treatment in the expectation that it would be easier to distinguish the difference in Ni decoration positions and Ni decoration/non-decoration in various analysis and evaluations.

### S1.2 Experimental

AS-Pd/ Al<sub>2</sub>O<sub>3</sub> was calcined at 550C for 1hour as described in manuscript. Specifically, an aliquot of 3 g AS-Pd/Al<sub>2</sub>O<sub>3</sub> powder was heat-treated in an electric furnace at 750 °C, 850 °C, and 950 °C for 10h.

XRD analysis was carried out with D8 ADVANCE made by BRUKER and the diffraction peak of Pd at 2θ = around 54.9 ° was used to calculate Pd crystal size by Scherrer equation.

CO adsorption measurement was conducted in a CO pulse chemisorption method with Catalyst Analyzer BELCAT II made by Microtrac BEL Corp. The Pd crystal size was calculated from the amount of CO chemisorption by the calculation equation reported in the literature<sup>S1-S2</sup>.

An aliquot of about 0.35 g of Pd/Al<sub>2</sub>O<sub>3</sub> was placed in the sample holder. It was heated from room temperature to 400 °C under 100% He gas stream at 150 mL/min. After 15 min at 400 °C, the gas stream was changed to 100% H<sub>2</sub> at 150 mL/min, then pre-treated for 10min. Then 100% H<sub>2</sub> was changed to 100% Helium at 400 °C, kept 10min, then cool to 50 °C. After the pretreatment, 0.935 cm<sup>3</sup> / pulse, as STD, of CO was fed 12 times and CO in the outlet gas was detected by TCD. The amount of chemisorption was calculated by subtracting the small area of the 1<sup>st</sup> to 9<sup>th</sup> pulses from the area of the inlet pulse. The Pd crystal size was calculated from the amount of CO chemisorption by the calculation equation reported in the literature<sup>S1-S2</sup>.

S1: C. N. Costa, S. Y. Christou, G. Georgiou, A. M. Efstathiou, J. Catal., 219 (2003) 259.

S2: J.J.F. Scholten, A.P. Pijpers, A.M.L. Hustings, Catal. Rev.-Sci. Eng., 27 (1) (1985), p. 151.

The prepared materials were characterized with a scanning transmission electron microscope (STEM, JEOL HD2000). The sample powder was dispersed over a copper (Cu) grid mesh for STEM observations. Elemental analysis was carried out at several points in a sample by an energy-dispersive X-ray spectroscope (EDS) equipped with STEM to confirm that the white spot in the image was Pd (not shown the EDS spectra). STEM image analysis was carried out by WinROOF produced by MITANI CORPORATIN and the perimeter of the

white spot was measured, and the circle equivalent diameter was calculated for that perimeter.

### S1-3 Results

#### S1-3-1. XRD pattern and calculated PdO crystal size

Figure S1 showed XRD pattern of AS-, 750 °C, 850 °C, and 950 °C\_Pd/Al<sub>2</sub>O<sub>3</sub>. Diffraction peaks derived from PdO and Al<sub>2</sub>O<sub>3</sub> were observed. Triangle marks showed the significant peak of PdO crystal. When the pre-treatment temperature was 750°C, the diffraction peak intensity was almost the same as that of AS, but as the pre-treatment temperature increased beyond 750°C to 850°C and 950°C, the diffraction peak intensity from PdO increased. The diffraction peak at 2 $\theta$  around 54.9 ° was selected for the calculation of PdO crystal size because it has relative higher intensity and less degree of overlap with peaks derived from Al<sub>2</sub>O<sub>3</sub>. Calculated PdO crystal size was summarized in Table S1.

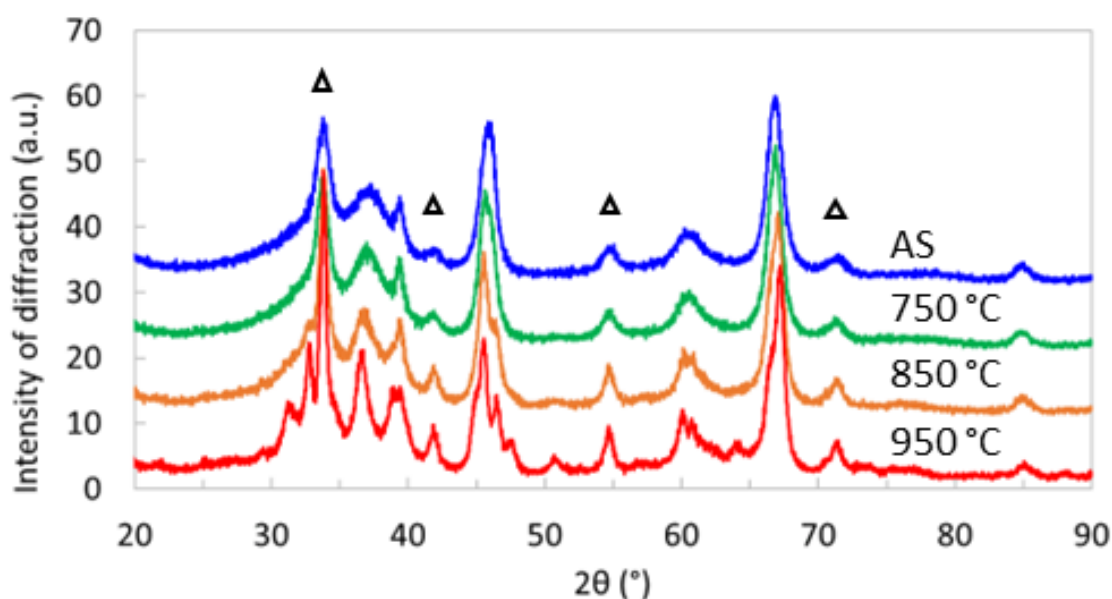

Figure S1. XRD pattern of AS-Pd/Al<sub>2</sub>O<sub>3</sub> and pre-treated at 750°C 850°C and 950°C for 10 hours.

Table S1. PdO crystal size calculated from XRD peak.

| Sample    | 2 $\theta$ (°) | Calculated PdO crystal size (nm) |
|-----------|----------------|----------------------------------|
| AS        | 55.0           | 6.8                              |
| 750°C×10h | 55.0           | 6.5                              |
| 850°C×10h | 54.8           | 10.7                             |
| 950°C×10h | 54.8           | 14.3                             |

### S1-3-2. CO pulse experimental results and calculated Pd crystal size

CO adsorption amount in CO pulse experiment and calculated Pd crystal diameter were summarized in Table S2. Pd content in the sample was necessary to calculate from CO adsorption amount to Pd crystal diameter and 2.87 wt% of Pd which was ICP analysis result

Table S2. Pd crystal size calculated with CO pulse experiment.

| Sample      | CO adsorption amount (cm <sup>3</sup> /g) | Calculated Pd crystal diameter (nm) |
|-------------|-------------------------------------------|-------------------------------------|
| AS          | 0.77                                      | 8.6                                 |
| 750°C × 10h | 0.68                                      | 9.8                                 |
| 850°C × 10h | 0.45                                      | 15                                  |
| 950°C × 10h | 0.25                                      | 27                                  |

on AS-Pd/Al<sub>2</sub>O<sub>3</sub> was used.

### S1-3-3. STEM observation and image analysis results

We carried out STEM observation on AS-, 750 °C, 850 °C, and 950 °C\_Pd/Al<sub>2</sub>O<sub>3</sub> samples to get Pd size distribution through image analysis with WinROOF. Figure S2 showed an example

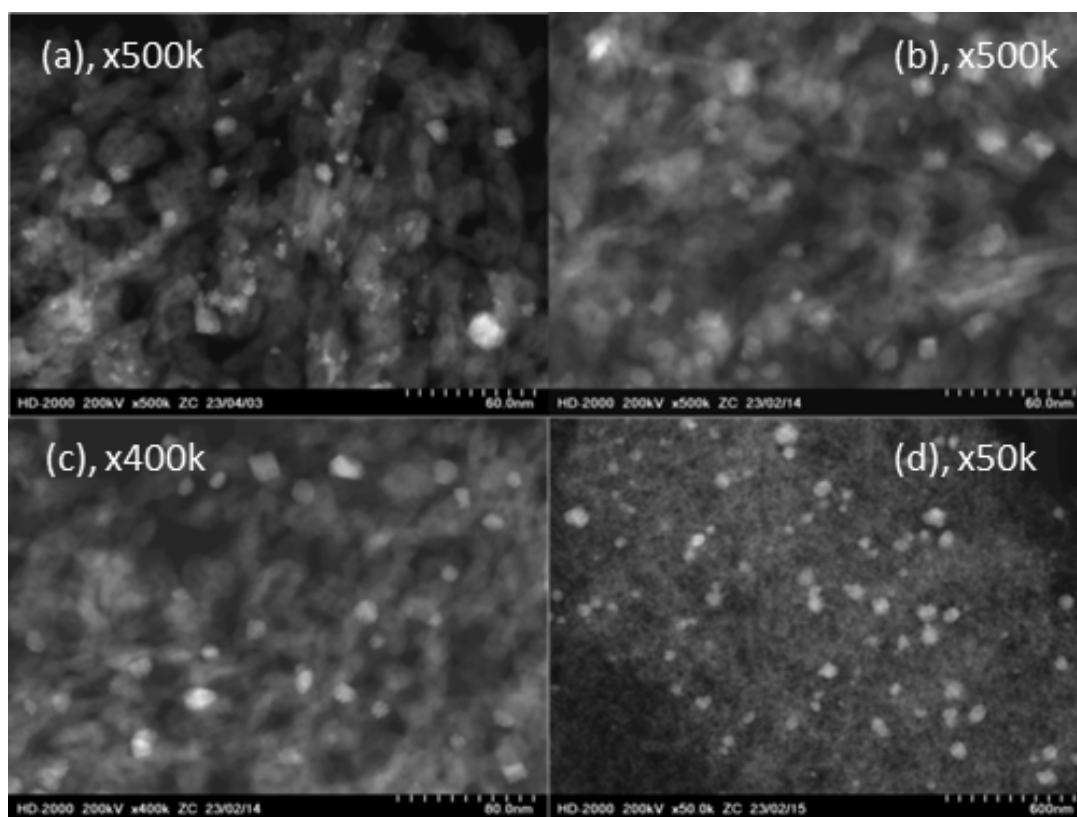

Figure S2. Examples of STEM image on Pd/Al<sub>2</sub>O<sub>3</sub> samples. AS (a), 750 °C x 10h aged (b), 850 °C x 10h aged (c) and 950 °C x 10h aged (d).

of STEM image of samples for the image analysis.



Table S3 summarized Pd particle size based on image analysis of STEM observation images ( $\phi$ \_STEM), and Table S4 & Figure S3 showed the particle size distribution.

Table S3. Calculated diameters based on STEM image analysis with WinROOF.

| Sample                | AS   | 750C<br>10h<br>Aged | 850C<br>10h<br>Aged | 950C<br>10h<br>Aged |
|-----------------------|------|---------------------|---------------------|---------------------|
| Average diameter (nm) | 6.0  | 7.5                 | 10.3                | 50.9                |
| Maximum diameter (nm) | 17.1 | 16.6                | 135                 | 119                 |
| Minimum diameter (nm) | 2.4  | 2.5                 | 3.0                 | 20.6                |

Table S4. Particle size distribution of Pd based on STEM image analysis by WinROOF.

| Sample                          |       | Frequency (%) |                  |                  |                  |
|---------------------------------|-------|---------------|------------------|------------------|------------------|
|                                 |       | AS            | 750C 10h<br>Aged | 850C 10h<br>Aged | 950C 10h<br>Aged |
| Number of particle for analysis |       | 1335          | 869              | 1610             | 1653             |
| Range (nm)                      | 0-1   | 0.0%          | 0.0%             | 0.0%             | 0.0%             |
|                                 | 1-2   | 0.0%          | 0.0%             | 0.0%             | 0.0%             |
|                                 | 2-3   | 2.2%          | 1.0%             | 0.0%             | 0.0%             |
|                                 | 3-4   | 16.4%         | 6.1%             | 2.4%             | 0.0%             |
|                                 | 4-5   | 21.7%         | 10.9%            | 3.3%             | 0.0%             |
|                                 | 5-6   | 17.8%         | 13.7%            | 4.8%             | 0.0%             |
|                                 | 6-7   | 15.4%         | 17.0%            | 7.2%             | 0.0%             |
|                                 | 7-8   | 9.4%          | 12.5%            | 11.3%            | 0.0%             |
|                                 | 8-9   | 5.8%          | 10.0%            | 12.9%            | 0.0%             |
|                                 | 9-10  | 4.4%          | 10.0%            | 14.8%            | 0.0%             |
|                                 | 10-11 | 3.7%          | 6.9%             | 11.1%            | 0.0%             |
|                                 | 11-12 | 2.2%          | 5.4%             | 10.9%            | 0.0%             |
|                                 | 12-13 | 0.4%          | 4.0%             | 6.7%             | 0.0%             |
|                                 | 13-14 | 0.4%          | 1.4%             | 5.9%             | 0.0%             |
|                                 | 14-15 | 0.1%          | 0.6%             | 3.1%             | 0.0%             |
|                                 | 15-16 | 0.0%          | 0.2%             | 2.4%             | 0.0%             |
|                                 | 16-17 | 0.0%          | 0.1%             | 0.9%             | 0.0%             |
|                                 | 17-18 | 0.1%          | 0.0%             | 0.4%             | 0.0%             |
|                                 | 18-19 | 0.0%          | 0.0%             | 0.1%             | 0.0%             |
|                                 | 19-20 | 0.0%          | 0.0%             | 0.0%             | 0.0%             |
|                                 | 20-21 | 0.0%          | 0.0%             | 0.0%             | 0.2%             |
|                                 | 21-22 | 0.0%          | 0.0%             | 0.0%             | 0.0%             |
|                                 | 22-23 | 0.0%          | 0.0%             | 0.0%             | 0.1%             |
|                                 | 23-24 | 0.0%          | 0.0%             | 0.0%             | 0.2%             |
|                                 | 24-25 | 0.0%          | 0.0%             | 0.0%             | 0.2%             |
|                                 | 25-26 | 0.0%          | 0.0%             | 0.0%             | 0.5%             |
|                                 | 26-27 | 0.0%          | 0.0%             | 0.0%             | 0.8%             |
|                                 | 27-28 | 0.0%          | 0.0%             | 0.0%             | 0.8%             |
|                                 | 28-29 | 0.0%          | 0.0%             | 0.0%             | 1.1%             |
|                                 | 29-30 | 0.0%          | 0.0%             | 0.0%             | 1.6%             |
|                                 | 30-31 | 0.0%          | 0.0%             | 0.0%             | 2.1%             |
|                                 | 31-32 | 0.0%          | 0.0%             | 0.0%             | 1.6%             |
|                                 | 32-33 | 0.0%          | 0.0%             | 0.0%             | 1.3%             |
|                                 | 33-34 | 0.0%          | 0.0%             | 0.0%             | 1.5%             |
|                                 | 34-35 | 0.0%          | 0.0%             | 0.0%             | 1.4%             |
|                                 | 35-36 | 0.0%          | 0.0%             | 0.0%             | 1.9%             |
|                                 | 36-37 | 0.0%          | 0.0%             | 0.0%             | 2.2%             |
|                                 | 37-38 | 0.0%          | 0.0%             | 0.0%             | 2.4%             |
|                                 | 38-39 | 0.0%          | 0.0%             | 0.0%             | 3.1%             |
|                                 | 39-40 | 0.0%          | 0.0%             | 0.0%             | 2.0%             |
|                                 | 40-41 | 0.0%          | 0.0%             | 0.0%             | 2.8%             |
|                                 | 41-42 | 0.0%          | 0.0%             | 0.0%             | 2.7%             |
|                                 | 42-43 | 0.0%          | 0.0%             | 0.0%             | 2.7%             |
|                                 | 43-44 | 0.0%          | 0.0%             | 0.0%             | 2.3%             |
|                                 | 44-45 | 0.0%          | 0.0%             | 0.0%             | 2.7%             |
|                                 | 45-46 | 0.0%          | 0.0%             | 0.1%             | 3.4%             |
|                                 | 46-47 | 0.0%          | 0.0%             | 0.0%             | 2.7%             |
|                                 | 47-48 | 0.0%          | 0.0%             | 0.0%             | 2.7%             |
|                                 | 48-49 | 0.0%          | 0.0%             | 0.0%             | 2.6%             |
|                                 | 49-50 | 0.0%          | 0.0%             | 0.0%             | 2.2%             |
|                                 | >50   | 0.0%          | 0.0%             | 1.0%             | 48.3%            |

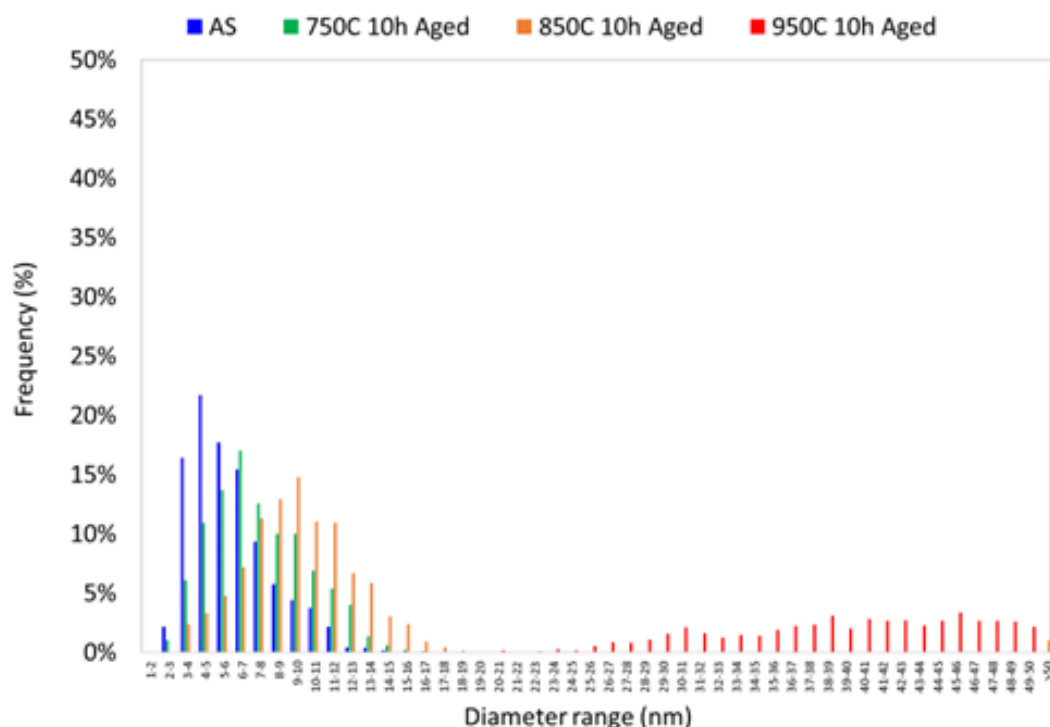

Figure S3. Particle size distribution of Pd based on STEM image analysis by WinROOF.

#### S 1-3-4. Summary of PdO crystal size & Pd particle size by thermal treatment

Table S5 summarized PdO crystal size calculated by XRD ( $\phi_{\text{XRD}}$ ), Pd crystal size calculated by CO pulse experimental results ( $\phi_{\text{CO}}$ ), and average Pd particle size based on image analysis of STEM observation images ( $\phi_{\text{STEM}}$ ).

Table S5. Summary of the dispersed Pd size.

| Pretreatment conditions | PdO crystal size (nm) | Pd crystal size (nm) | Pd particle size (nm) |
|-------------------------|-----------------------|----------------------|-----------------------|
|                         | XRD                   | CO pulse             | STEM_average          |
| (AS)                    | 6.8                   | 9                    | 6                     |
| 750 °C 10 h             | 6.5                   | 10                   | 8                     |
| 850 °C 10 h             | 10.7                  | 15                   | 10                    |
| 950 °C 10 h             | 14.3                  | 27                   | 51                    |

$\phi_{\text{XRD}}$  of AS-Pd/Al<sub>2</sub>O<sub>3</sub> was 6.8nm and it was almost the same for that of 750 °C\_Pd/Al<sub>2</sub>O<sub>3</sub> (6.5nm). The growth of  $\phi_{\text{XRD}}$  was confirmed at 10.7nm in the 850 °C\_Pd/Al<sub>2</sub>O<sub>3</sub> sample and 14.3nm in the 950 °C\_Pd/Al<sub>2</sub>O<sub>3</sub> sample. A similar trend was observed in the results of  $\phi_{\text{CO}}$  and  $\phi_{\text{STEM}}$ . Raising the pre-treatment temperature up to 950 °C above 850 °C could result in excessive sintering of Pd crystals.

#### S 1-3-5. Catalytic performance test for CH<sub>4</sub> removal

We carried out the catalytic performance test for CH<sub>4</sub> removal on AS-, 750 °C, 850 °C, and 950 °C\_Pd/Al<sub>2</sub>O<sub>3</sub> samples to decide pre-treatment temperature not to degrade excessively. Figure S4 showed CH<sub>4</sub> removal focusing at around 270 °C to 390 °C (left) and Pre-treatment temperature effect on CH<sub>4</sub>-T20 (right). Pre-treatment at 850 °C showed moderate

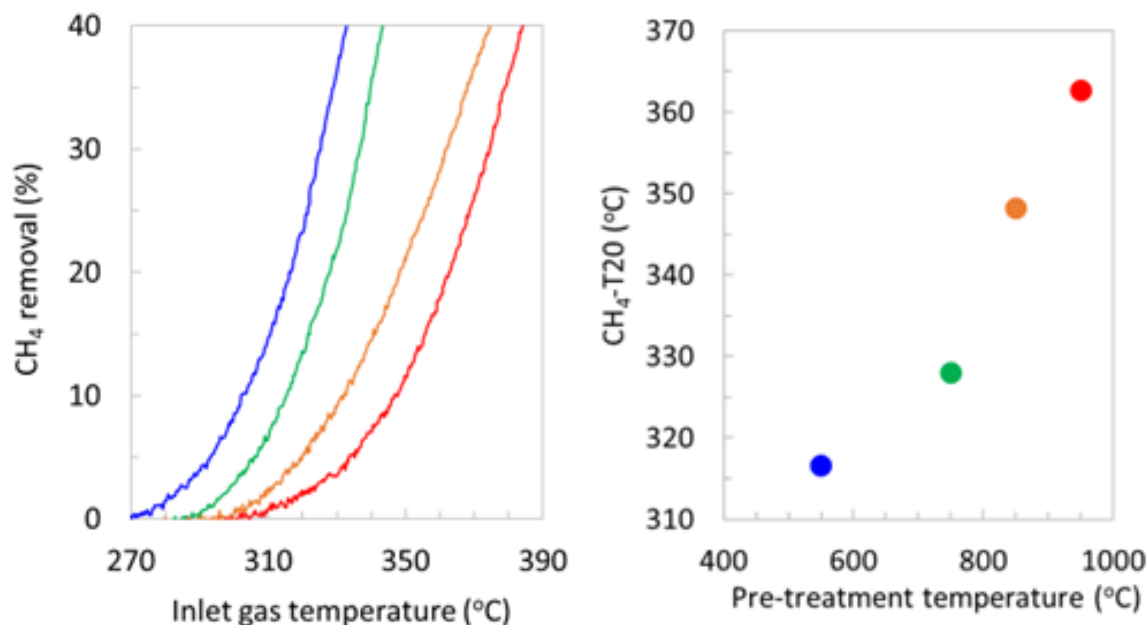

Figure S4. Catalytic performance test results for CH<sub>4</sub> removal (left) and pre-treatment temperature effect on CH<sub>4</sub>-T20 (right). Blue: AS-Pd/Al<sub>2</sub>O<sub>3</sub>, Green: 750 °C x 10h aged, Orange: 850 °C x 10h aged, Red: 950 °C x 10h aged.

degradation effect on CH<sub>4</sub>-T20 compared that at 750 °C and 950 °C

### S 1-3.6. Conclusion of the preliminary study

Considering the degree of intentional growth of Pd crystals using sintering by pretreatment and its effect on activity, we decided to proceed with this study by applying pre-treatment at 850 °C for 10 h. From the viewpoint of intentional growth of Pd crystals, a temperature beyond 750 °C was appropriate. On the other hand, the effect of pre-treatment temperature on the catalytic performance for CH<sub>4</sub> removal was smaller at lower temperatures in the range investigated, and there was a concern that excessive deactivation may occur at 950 °C. These were reasons to decide 850 °C.

## S2. Experimental details of Ni decoration methods

### S2-1. Detail experimental information about the CVD method

The chemical vapor deposition (CVD) method was applied using the pyrolysis of  $\text{Ni}(\text{CO})_4$  to load Ni at the edge of Pd crystals. Figure S5 showed the detailed experimental information about Ni-CVD. It consisted of  $\text{H}_2$  reduction of Ni for 20 minutes,  $\text{H}_2$  reduction of Pd for 20 minutes and Ni-CVD for the necessary duration.

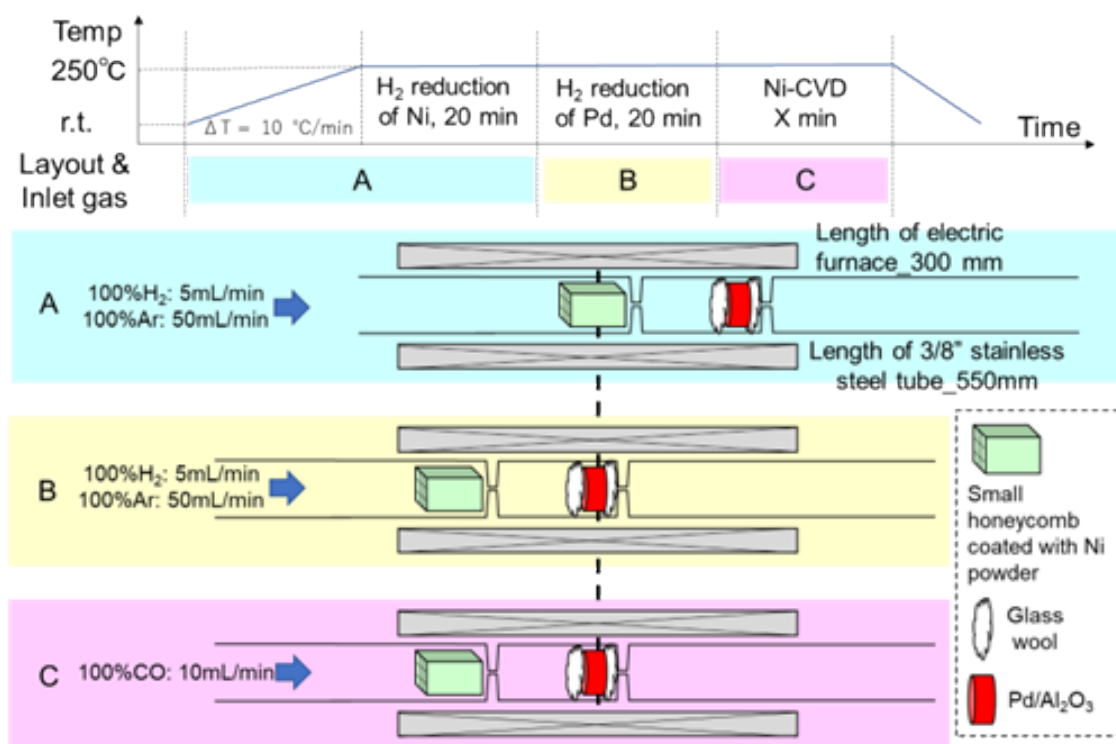

**Figure S5. Detail experimental information about Ni-CVD.**  
Temperature program and setting position of 3/8" Stainless steel tube and samples filled in it in relation to electric furnace

minutes and Ni-CVD for the necessary duration.

First, Nickel powder was coated on the small honeycomb substrate. The cordierite honeycomb (NGK, C558, 300 cell 12 mil) was cut into 3 x 3 gas channels with 50 mm length. A 40 wt% Ni dispersed slurry was prepared by mixing 100 g of Nickel powder ( $<50\mu\text{m}$ , 99.7% trace metals basis, Sigma-Aldrich) and 150 g of pure water. The small cordierite honeycomb was immersed in the well-stirred Ni-dispersed slurry for 10 seconds, then removed and centrifuged at 1000 rpm for 1 minute. The resulting honeycomb was dried at  $180^\circ\text{C}$  for 1.5 hours. As a result, a honeycomb loaded with 0.03 g of Ni powder per unit was obtained.

A 3/8" stainless steel tube with a total length of 550 mm was used as the sample holder. A recess was made at 315 mm from the inlet side for the stopper and filled with 0.1 g of glass wool, an aliquot of 0.3 g of  $\text{Pd}/\text{Al}_2\text{O}_3$  powder, and 0.1 g of glass wool in that order. The honeycomb coated with Ni powder was then installed, after making another recess for a

stopper at a position 215 mm from the inlet side. The sample-filled holder was placed in a 300 mm long electric furnace (ARF-30KC, Asahi Rika Seisakusyo Corporation), where the hydrogen reduction of Ni, the hydrogen reduction of Pd/Al<sub>2</sub>O<sub>3</sub>, the generation of Ni(CO)<sub>4</sub> and its pyrolysis of it on the Pd/Al<sub>2</sub>O<sub>3</sub> powder were sequentially performed.

In hydrogen treatments, the sample-filled holder was first set up so that the Ni-coated honeycomb was positioned in the center of the electric furnace, and the temperature was increased from room temperature to 250 °C at 10 °C /min under a mixed gas flow of 5 mL/min H<sub>2</sub> gas and 50 mL/min Ar gas, and treated at 250 °C for 20 min. Then, the sample holder was moved to position the Pd/Al<sub>2</sub>O<sub>3</sub> installation part at the center of the electric furnace for H<sub>2</sub> treatment of the Pd/Al<sub>2</sub>O<sub>3</sub> part and treated at 250°C for 20 minutes in the same manner.

After the completion of the preliminary hydrogen treatments, the feed gas was changed to CO at 10 mL/min while the temperature of the Pd/Al<sub>2</sub>O<sub>3</sub> powder part was maintained at 250°C. It was reported that Nickel reacts with carbon monoxide to form nickel carbonyl gas, Ni(CO)<sub>4</sub>, at around 50-80 °C.<sup>18-19</sup> Temperature is an important experimental parameter in Ni-CVD and details temperature distribution at the outer surface of the 3/8" stainless steel tube was shown in Figure S6. The temperature of the Ni powder-coated honeycomb part was around 55-170 °C based on it. The pyrolysis treatment of Ni(CO)<sub>4</sub> was conducted for 1h,

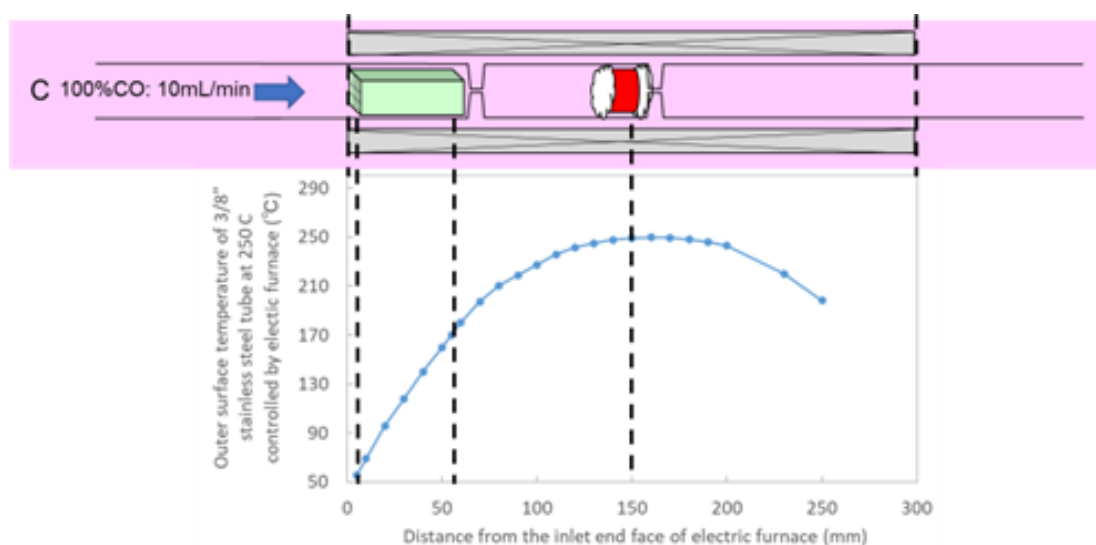

**Figure S6. Measurement result of the outer surface temperature of 3/8" stainless steel tube during Ni-CVD at 250 °C which was controlled by electric furnace.**

6h, 20h, and 100h, respectively.

After the Ni(CO)<sub>4</sub> pyrolysis, the feed gas was changed to Ar gas at 50 mL/min, the temperature was lowered to room temperature, and the sample holder was removed from the treatment line. The stainless-steel tube was then cut and Ni decorated Pd/Al<sub>2</sub>O<sub>3</sub>

(Ni@Pd/ Al<sub>2</sub>O<sub>3</sub>) powder was recovered and used for subsequent the catalytic performance test for CH<sub>4</sub> removal and various characterizations. The resulting sample was labeled X\_Ni@Pd/Al<sub>2</sub>O<sub>3</sub> (X = 1, 6, 20, and 100) based on the duration of thermal decomposition hereafter.

The experimental procedure of Ni-CVD was performed for AS-Pd/Al<sub>2</sub>O<sub>3</sub> as same as for Pd/Al<sub>2</sub>O<sub>3</sub> described above. The resulting sample was labeled X\_Ni@AS-Pd/Al<sub>2</sub>O<sub>3</sub>, X means the Ni-CVD duration time, hereafter.

## S2-2. Detail experimental information about Wet impregnation (WI) method

10 wt% aqueous solution of Nickel (II) Acetate (NiAc) Tetrahydrate ( $\text{Ni}(\text{CH}_3\text{COO})_2 \cdot 4\text{H}_2\text{O}$ : NiAc, KANTO CHEMICAL Co. Inc.) solution was prepared with De-Ionized Water (DIW). The NiAc aqueous solution was mixed with an aliquot of 0.3 g of  $\text{Pd}/\text{Al}_2\text{O}_3$  powder to the desired amount of Ni. The mixture was dried overnight at 80 °C and calcined in an electric furnace at 550 °C for 1 hour.

## S3. Experimental details of characterizations

Pd and Ni content in each sample were quantified by inductively coupled plasma atomic emission spectrometry (ICP-AES) with ICPS-8100 made by SHIMADZU CORPORATION. At first, sulfuric acid and Nitric acid was mixed in a conical beaker, and  $\text{Ni@Pd}/\text{Al}_2\text{O}_3$  powder was added into the mixed acid solution and heated up to 300 °C for the thermal decomposition. After the pyrolysis, the liquid solution was used for Ni quantification. For Pd quantification, the solid obtained by cooling after the pyrolysis was dissolved in hydrochloric acid, a co-precipitant tellurium (Te) was added, and Pd was precipitated with a reducing agent such as tin chloride ( $\text{SnCl}_2$ ), thereby Pd was separated and recovered. The separated and recovered Pd was dissolved in hydrochloric acid and used for quantitative determination by ICP.

#### S4. The other Supplemental figures

Table S6 summarized Pd nanocrystal size of Pd/Al<sub>2</sub>O<sub>3</sub> and X\_Ni@Pd/Al<sub>2</sub>O<sub>3</sub> (X = 1, 6, 20, and 100). XRD diffraction patterns were shown in Figure 1*b* of the manuscript.

**Table S6. Pd nanocrystal size before and after Ni-CVD treatment**

| Pretreatment conditions | Duration of Ni-CVD | Observed diffraction peak of Pd | 2 $\theta$ , selected for the crystal size calculation | Pd crystal size (nm) |
|-------------------------|--------------------|---------------------------------|--------------------------------------------------------|----------------------|
| 850 °C 10 h             | none               | PdO                             | 54.8                                                   | 11                   |
| 850 °C 10 h             | 1 h                | Pd metal                        | 82                                                     | 14                   |
| 850 °C 10 h             | 6 h                | Pd metal                        | 82                                                     | 13                   |
| 850 °C 10 h             | 20 h               | Pd metal                        | 82                                                     | 11                   |
| 850 °C 10 h             | 100 h              | Pd metal                        | 82                                                     | 12                   |



Figure S7 showed STEM image (a), and EDS mapping of Pd (b) and Ni (c) in WI at 17400 wtppm Ni sample. Figure S5d showed Pd and Ni overlay mapping and Ni was located on

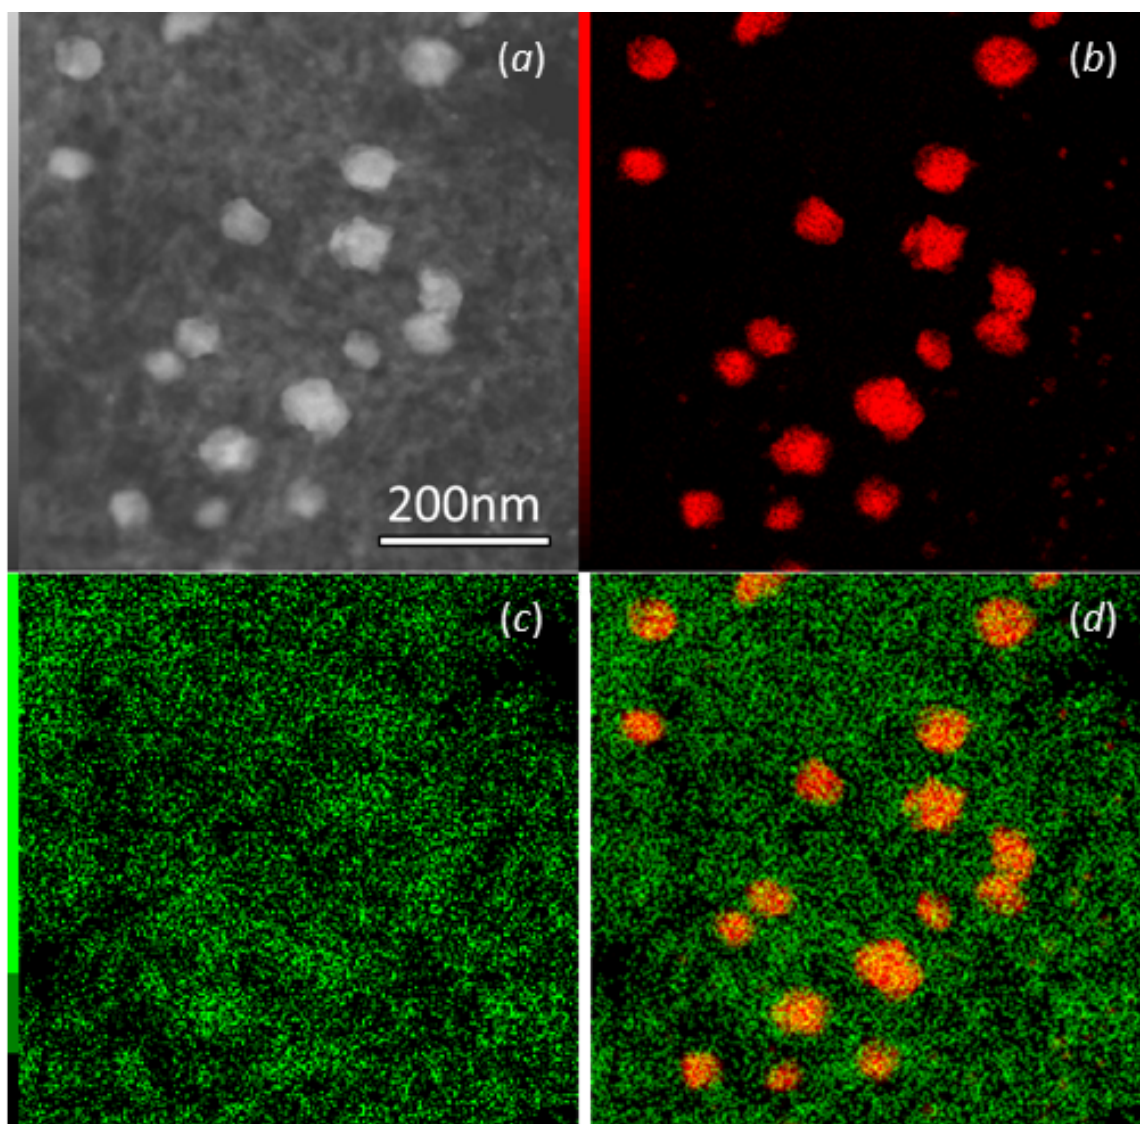

Figure S7. STEM-EDS results of WI at 17400 wt ppm Ni sample. STEM image (a), EDS mapping of Pd (b), EDS mapping of Ni (c) and Pd and Ni overlay mapping (d).

both Pd crystal and the other place which was  $\text{Al}_2\text{O}_3$  support material.

Figure S8 showed STEM image (a), and EDS mapping of Pd (b) and Ni (c) in WI at 1300 wtppm Ni sample. Figure S6d showed Pd and Ni overlay mapping and Ni was located on both Pd crystal and the other place which was Al<sub>2</sub>O<sub>3</sub> support material as same as WI-H

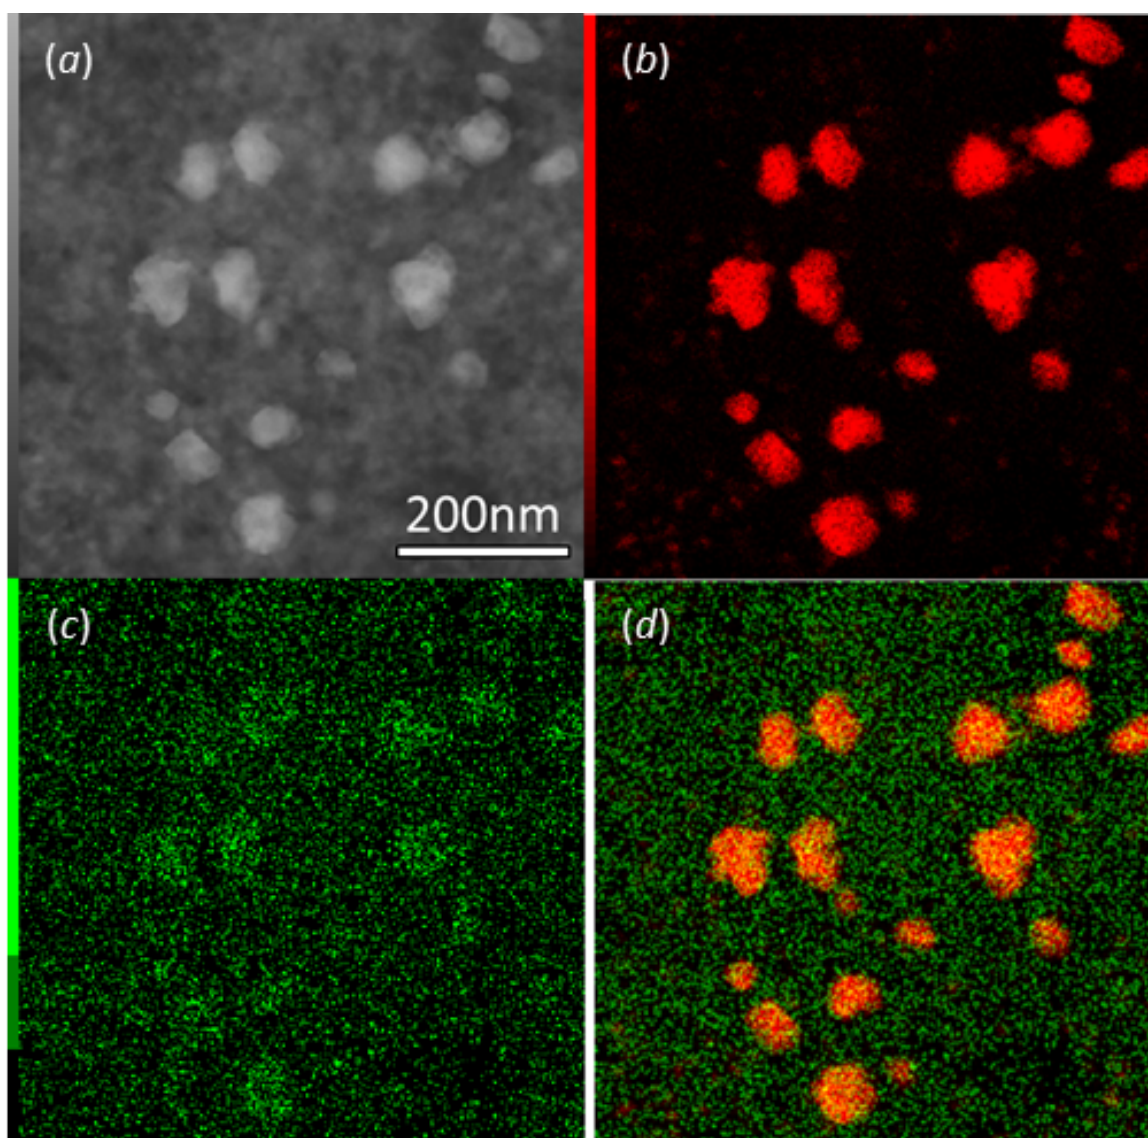

Figure S8. STEM-EDS results of WI at 1300 wt ppm Ni sample. STEM image (a), EDS mapping of Pd (b), EDS mapping of Ni (c) and Pd and Ni overlay mapping (d).

sample shown in Figure S5.

Figure S9 showed STEM image (a), and EDS mapping of Al (b), Ni(c) and Pd (d) in 20\_Ni@Pd/Al<sub>2</sub>O<sub>3</sub> sample. The existence of Pd was confirmed on Al<sub>2</sub>O<sub>3</sub> support material. However, the intensity of Ni was too low to be detectable because Ni content was 110 ppm

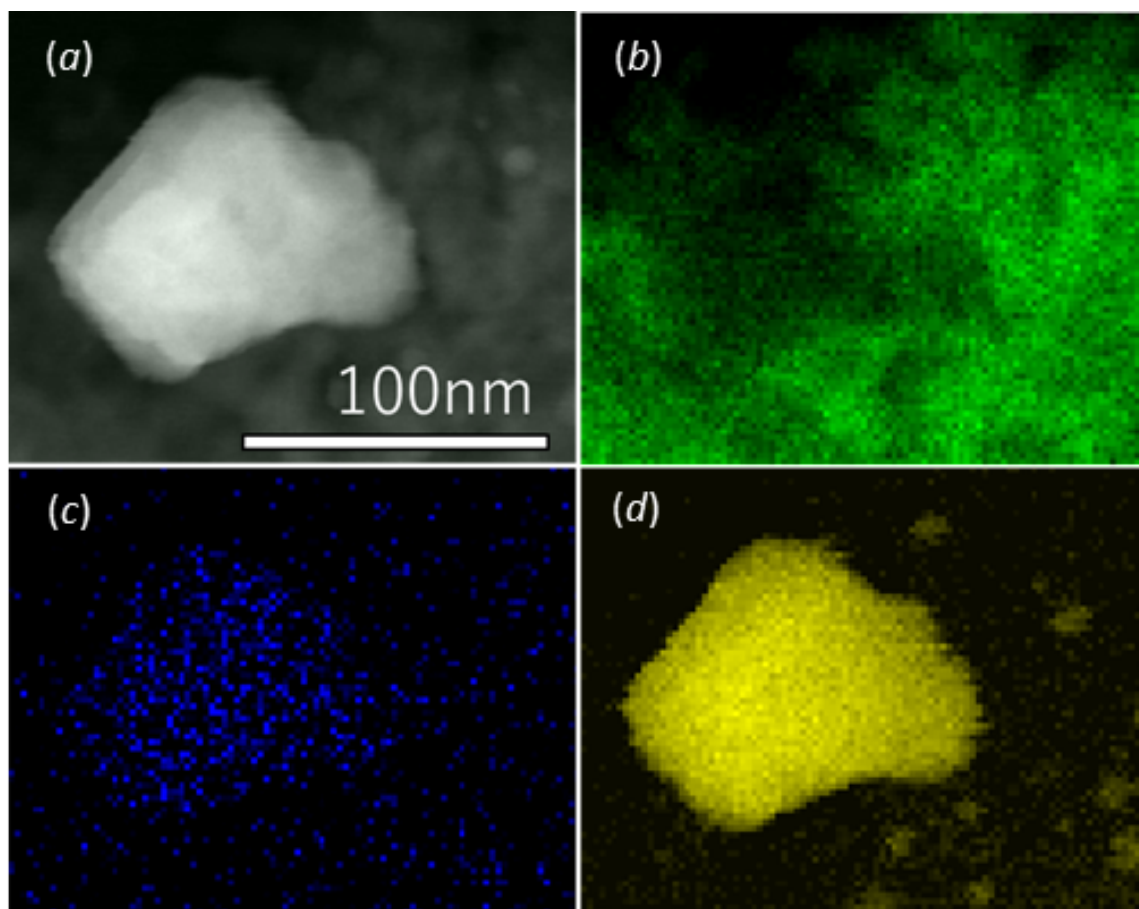

Figure S9. STEM-EDS results of 20\_Ni@Pd/Al<sub>2</sub>O<sub>3</sub> sample. STEM image (a), EDS mapping of Al (b), EDS mapping of Ni (c) and EDS mapping of Pd (d).

reported in Figure 2a.

Figure S10 showed STEM image (a), and EDS mapping of Al (b), Ni (c) and Pd (d) in 6\_Ni@Pd/Al<sub>2</sub>O<sub>3</sub> sample. Pd and Ni distribution was like 20\_Ni@Pd/Al<sub>2</sub>O<sub>3</sub> sample shown in Figure S7. The existence of Pd was confirmed on Al<sub>2</sub>O<sub>3</sub> support material. However, the intensity of Ni was too low to be detectable because Ni content was 150 ppm reported in Figure 2a.

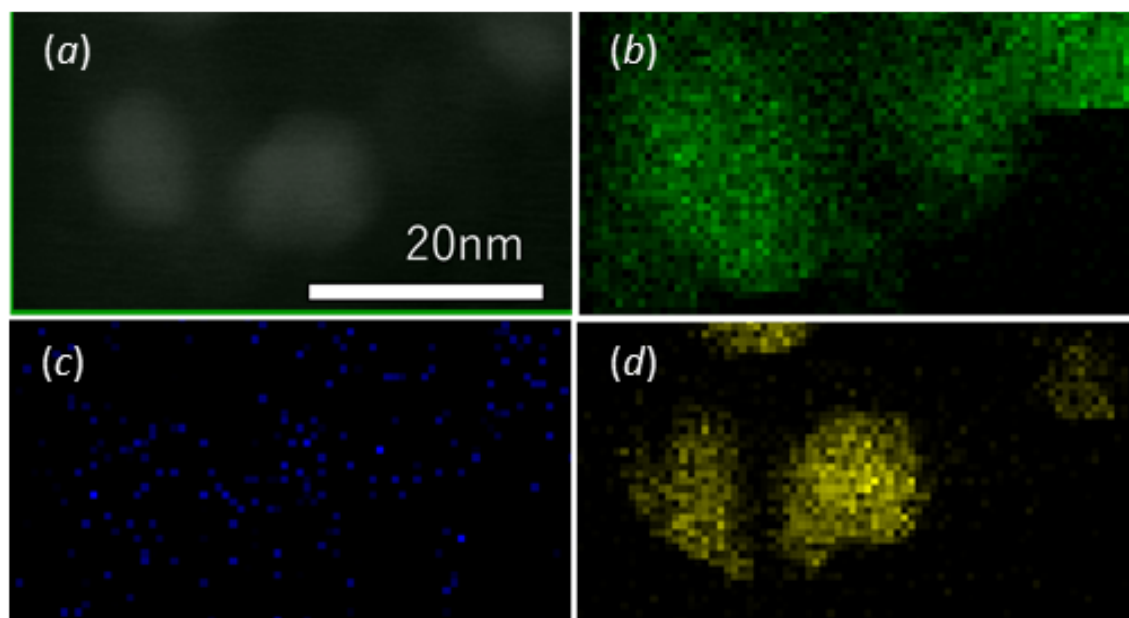

Figure S10. STEM-EDS results of 6\_Ni@Pd/Al<sub>2</sub>O<sub>3</sub> sample. STEM image (a), EDS mapping of Al (b), EDS mapping of Ni (c) and EDS mapping of Pd (d).

Figure S11 showed STEM-EDS results of 100\_Ni@AS-Pd/Al<sub>2</sub>O<sub>3</sub> sample at low magnification. STEM image (a), EDS mapping of Oxygen (b), Aluminum (c), Pd (d) and Nickel (e). Nickel was detected only from on and around Pd particles, not detected from on Al<sub>2</sub>O<sub>3</sub>.

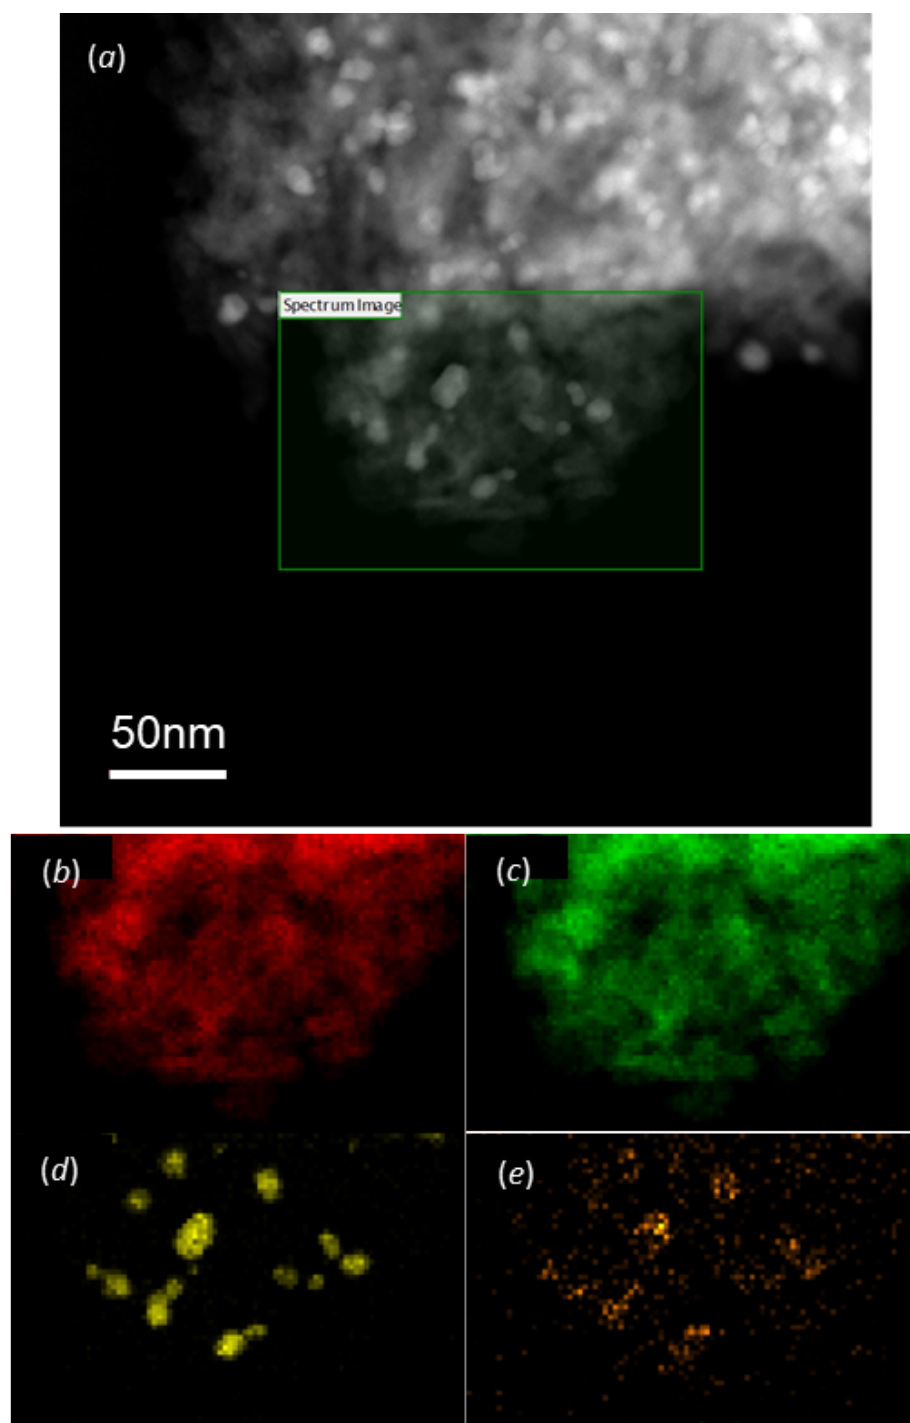

Figure S11. STEM image at low magnification of Ni-decorated Pd nanocrystals in 100\_Ni@AS-Pd/Al<sub>2</sub>O<sub>3</sub> (a) and EDS mapping images of Oxygen (b), Aluminum (c), Pd (d), and Ni (e).



Figure S12 showed STEM-EDS results of 100\_Ni@AS-Pd/Al<sub>2</sub>O<sub>3</sub> sample at high magnification. STEM image (a), a morphological model of Pd nanocrystal (b), and EDS mapping images of the same Pd nanocrystals for the elemental distribution of Ni (c) and Pd (d). Nickel was decorated near the edges of the polyhedral palladium nanocrystals, which resembled

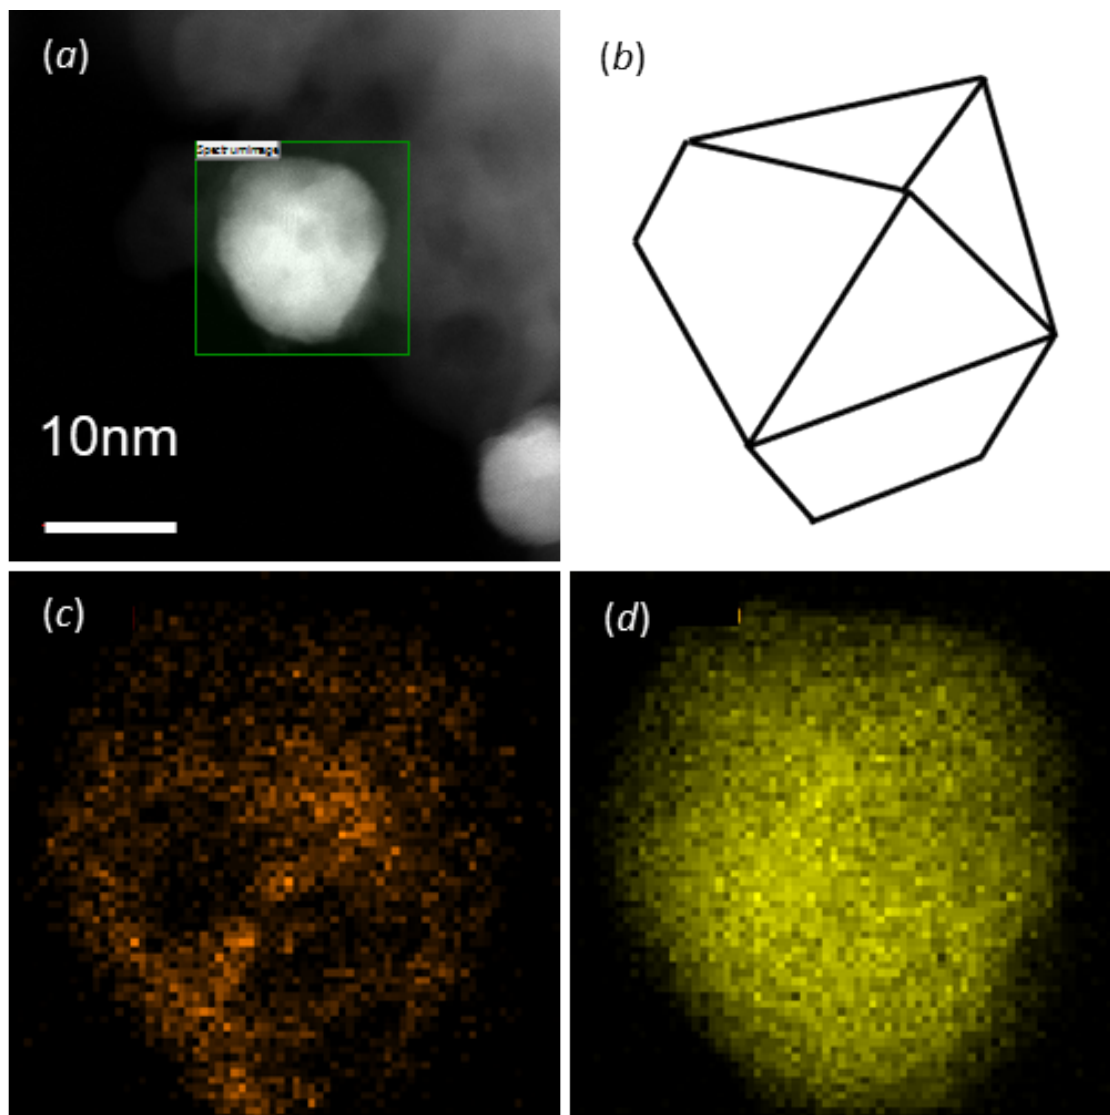

Figure S12. STEM image at high magnification of Ni-decorated Pd nanocrystals in 100\_Ni@AS-Pd/Al<sub>2</sub>O<sub>3</sub> (a) and its morphological model (b). EDS mapping images of the same Pd nanocrystal as (a) for the elemental distributions of Ni (c) and Pd (d).

octahedrons.

Table S7 summarized Pd and Ni content, CH<sub>4</sub>-T20 of AS-Pd/Al<sub>2</sub>O<sub>3</sub> samples with Ni decoration by both WI and Ni-CVD. There were 2 lots of “AS-Pd/Al<sub>2</sub>O<sub>3</sub>” in this study. The target Pd loading amount was 3wt% for both lots. Lot A resulted in 2.87 wt% of Pd and Lot B in 2.69wt% quantified by ICP. CH<sub>4</sub> removal efficiency depends on Pd content. Lot A and B had an 8.4 °C difference in CH<sub>4</sub>-T20. For the consideration of the effect of site-targeted decoration on AS-Pd/Al<sub>2</sub>O<sub>3</sub>, we calculated the temperature decrease of CH<sub>4</sub>-T20 from AS-Pd/Al<sub>2</sub>O<sub>3</sub> without Ni decoration in each lot and compared the effect between different decoration method, CVD and WI. The reduction of CH<sub>4</sub>-T20 by Ni decoration was similar for Ni-CVD and WI, but the amount of Ni required was about 1/10 of that for CVD compared to WI.

**Table S7. Comparison of Pd & Ni content and CH<sub>4</sub>-T20 of AS-Pd/Al<sub>2</sub>O<sub>3</sub> with Ni decoration by both WI and Ni-CVD**

| Sample                                                                  | Content |       | CH <sub>4</sub> -T20 | Temperature decrease of<br>CH <sub>4</sub> -T20 from AS-<br>Pd/Al <sub>2</sub> O <sub>3</sub> without Ni<br>decoration |
|-------------------------------------------------------------------------|---------|-------|----------------------|------------------------------------------------------------------------------------------------------------------------|
|                                                                         | Pd      | Ni    |                      |                                                                                                                        |
|                                                                         | wt%     | wtppm | °C                   | °C                                                                                                                     |
| AS-Pd/Al <sub>2</sub> O <sub>3</sub> _Lot A                             | 2.87    | —     | 316.2                | 0.0                                                                                                                    |
| 0.32% Ni decorated by WI on AS-Pd/Al <sub>2</sub> O <sub>3</sub> _Lot A | —       | 3150  | 314.4                | -1.7                                                                                                                   |
| 1.23% Ni decorated by WI on AS-Pd/Al <sub>2</sub> O <sub>3</sub> _Lot A | —       | 12290 | 314.6                | -1.6                                                                                                                   |
| 5.07% Ni decorated by WI on AS-Pd/Al <sub>2</sub> O <sub>3</sub> _Lot A | —       | 50690 | 316.7                | 0.5                                                                                                                    |
| AS-Pd/Al <sub>2</sub> O <sub>3</sub> _Lot B                             | 2.69    | —     | 324.6                | 0.0                                                                                                                    |
| 1_Ni@AS-Pd/Al <sub>2</sub> O <sub>3</sub> _Lot B                        | —       | 40    | 322.4                | -2.2                                                                                                                   |
| 100_Ni@AS-Pd/Al <sub>2</sub> O <sub>3</sub> _Lot B                      | —       | 290   | 322.8                | -1.9                                                                                                                   |

Figure S13 showed Ni content dependence of the temperature decrease of CH<sub>4</sub>-T20 from AS-Pd/Al<sub>2</sub>O<sub>3</sub> without Ni decoration. The reduction of CH<sub>4</sub>-T20 by Ni decoration was similar for Ni-CVD and WI, but the amount of Ni required was about 1/10 of that for CVD compared

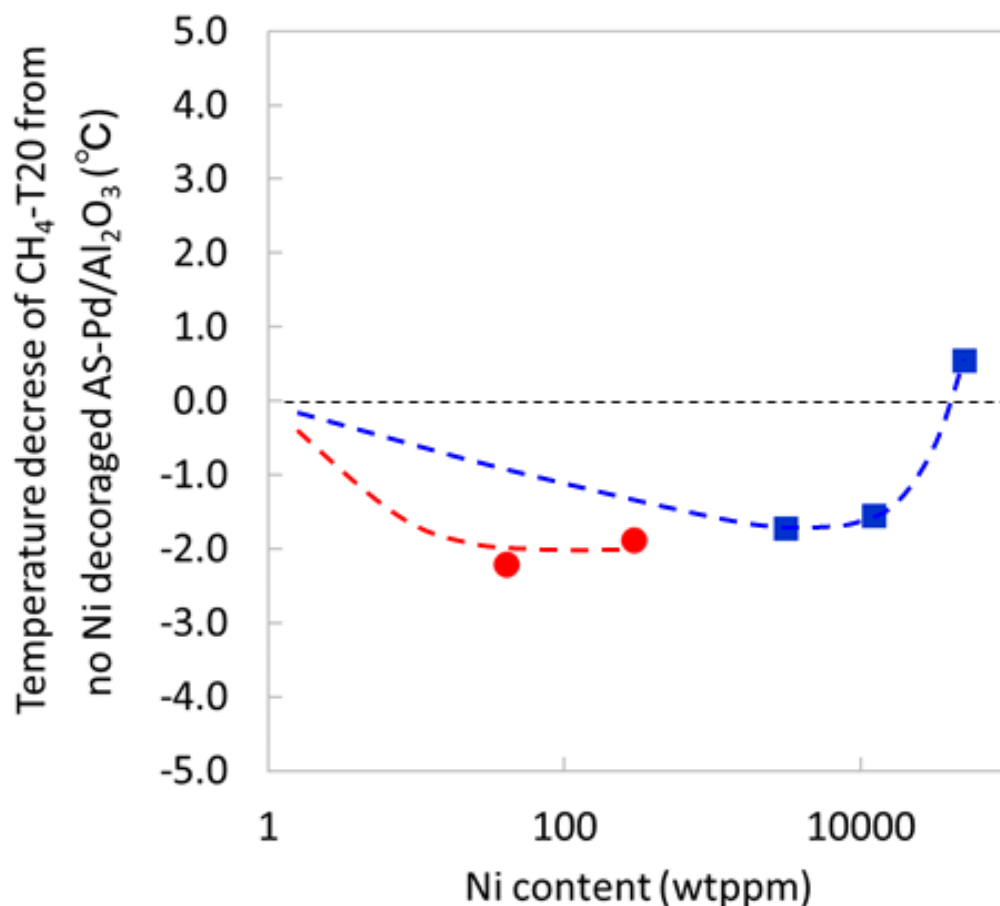

Figure S13. Temperature decrease of CH<sub>4</sub>-T20 from AS-Pd/Al<sub>2</sub>O<sub>3</sub> without Ni decoration. Black dash line correspond the CH<sub>4</sub>-T20 of AS-Pd/Al<sub>2</sub>O<sub>3</sub> without Ni decoration, Red plot and dash line correspond to Ni@AS-Pd/Al<sub>2</sub>O<sub>3</sub>, blue plot and dash line correspond to AS-Pd/Al<sub>2</sub>O<sub>3</sub> with Ni decoration by Wet impregnation.

to WI.
